# Supplementary material
Source: publisher site journal article supplement (https://www.dovepress.com/get_supplementary_file.php?f=263913.docx)
Supplement: Supplementary file 1 [file get_supplementary_file.php]

**Supplementary information Pathological features of patients with gastric cancer**

| Age | Sex | Tumor size | H-score |
| --- | --- | --- | --- |
| 71 | M | 1.5×2.5 cm | 171.721 |
| 78 | M | 10×8 cm | 196.245 |
| 67 | F | 3×2.5 cm | 172.039 |
| 61 | M | 2.5×2 cm | 192.066 |
| 70 | M | 12×10 cm | 158.775 |
| 69 | M | 6×4.5 cm | 175.553 |
| 73 | M | 4×3 cm | 138.482 |
| 60 | F | 8×4.5 cm | 151.099 |
| 91 | M | 5×2 cm | 184.115 |
| 50 | F | 5×3.5 cm | 196.473 |
| 60 | M | 6×6 cm | 177.12 |
| 52 | F | 5.2×3 cm | 200.091 |
| 53 | M | 5×3 cm | 152.436 |
| 57 | M | 4×3 cm | 196.952 |
| 47 | F | 5×3 cm | 162.919 |
| 67 | M | 2×1.5 cm | 171.077 |
| 71 | M | 7×4 cm | 193.16 |
| 62 | F | 6.5×3.5 cm | 165.222 |
| 58 | M | 4.5×2.5 cm | 176.849 |
| 60 | M | 5.5×5 cm | 181.657 |
| 59 | M | 5×4.5 cm | 150.539 |
| 65 | F | 4×2.5 cm | 186.974 |
| 64 | F | 2.5×2 cm | 155.737 |
| 48 | F | 4×2.5 cm | 155.532 |
| 49 | F | 4×3.5 cm | 169.723 |
| 65 | F | 3×2.8 cm | 176.653 |
| 71 | M | 2.5×3.5 cm | 188.489 |
| 53 | M | 0.7×0.6 cm | 176.602 |
| 41 | F | 3×2.8 cm | 196.645 |

H-score: (percentage of weak intensity ×1) + (percentage of moderate intensity×2)+percentage of strong intensity×3
